# Supplementary material
Source: PubMed Central journal article supplement (PMC5909692)
Supplement: NIHMS953850-supplement-Supp__Figure_1.pdf [file NIHMS953850-supplement-Supp__Figure_1.pdf]

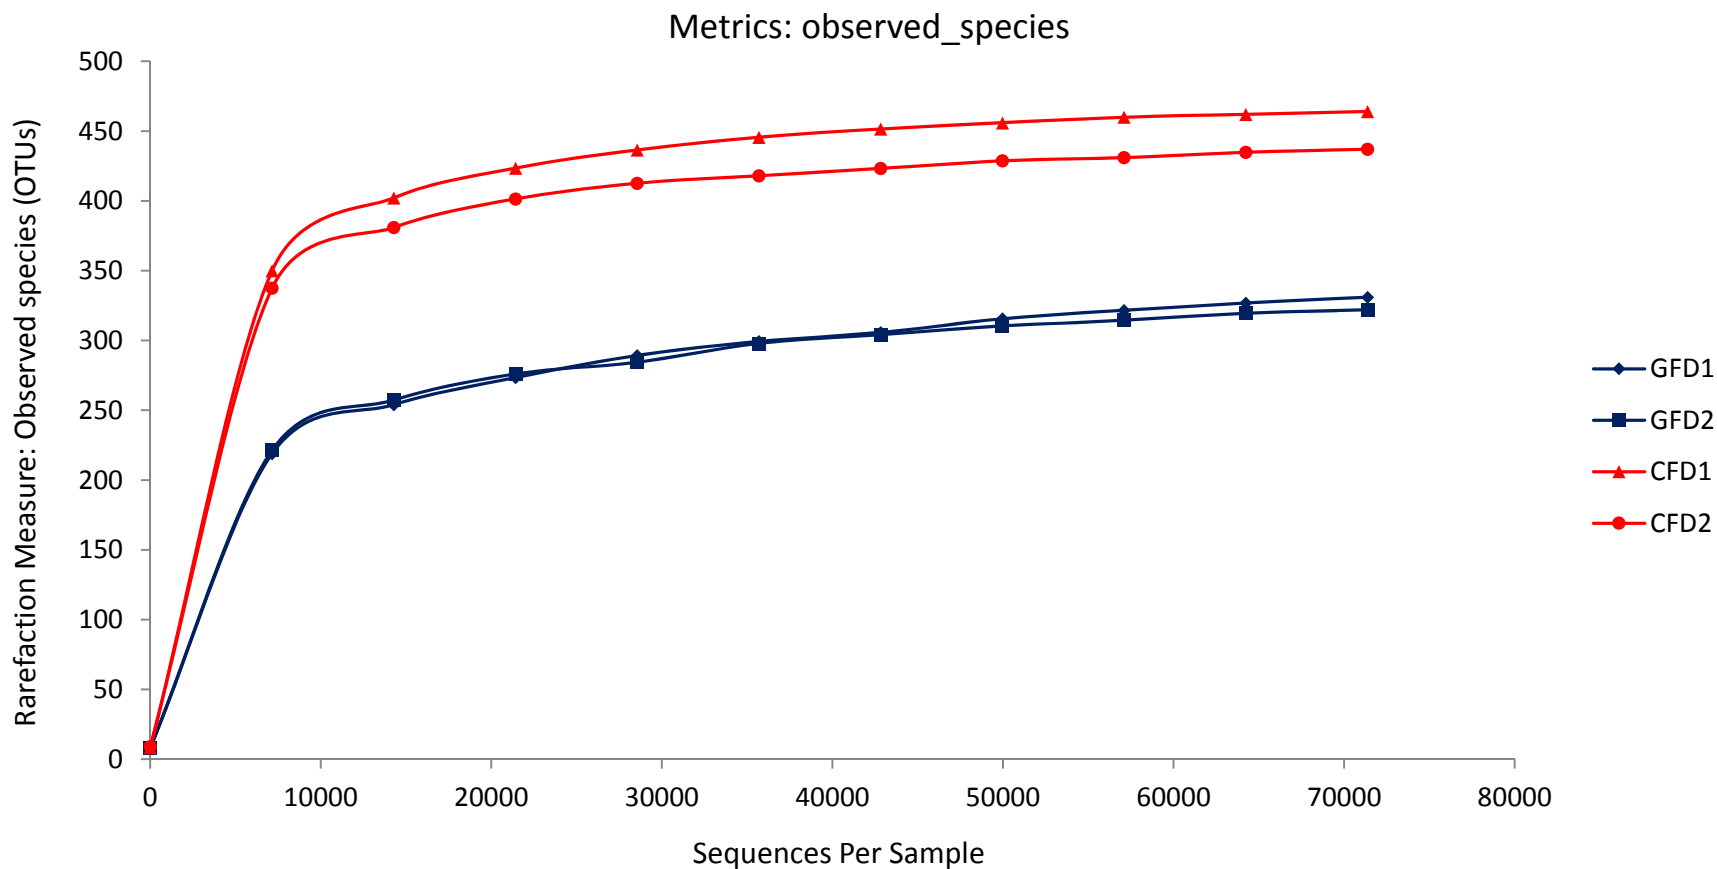

**Supplementary Figure 1:** Rarefaction curves of observed species (OTUs) number clustered at 3% 16S rRNA sequences variations generated from *D. rerio* fed with control formulated diet (CFD) and gluten formulated diet (GFD). This graph was created by QIIME (ver.1.8.0) by plotting the number of OTUs against the number of sequences. The plateau of the curves indicates that most of the species were observed in all four samples.
